# Supplementary material for: Immiscible lipids control the morphology of patchy emulsions
Source: Royal Society of Chemistry journal article supplement (doi:10.1039/c3sm51137e), 2013-01-01
Supplement: c3sm51137e.pdf [file c3sm51137e.pdf]

Supplemental Materials for the manuscript:  
Immiscible lipids control the morphology of patchy  
emulsions

Lea-Laetitia Pontani<sup>1</sup>, Martin F. Haase<sup>1</sup>, Izabela Raczkowska<sup>1</sup>, Jasna Brujic<sup>1</sup>

April 22, 2013

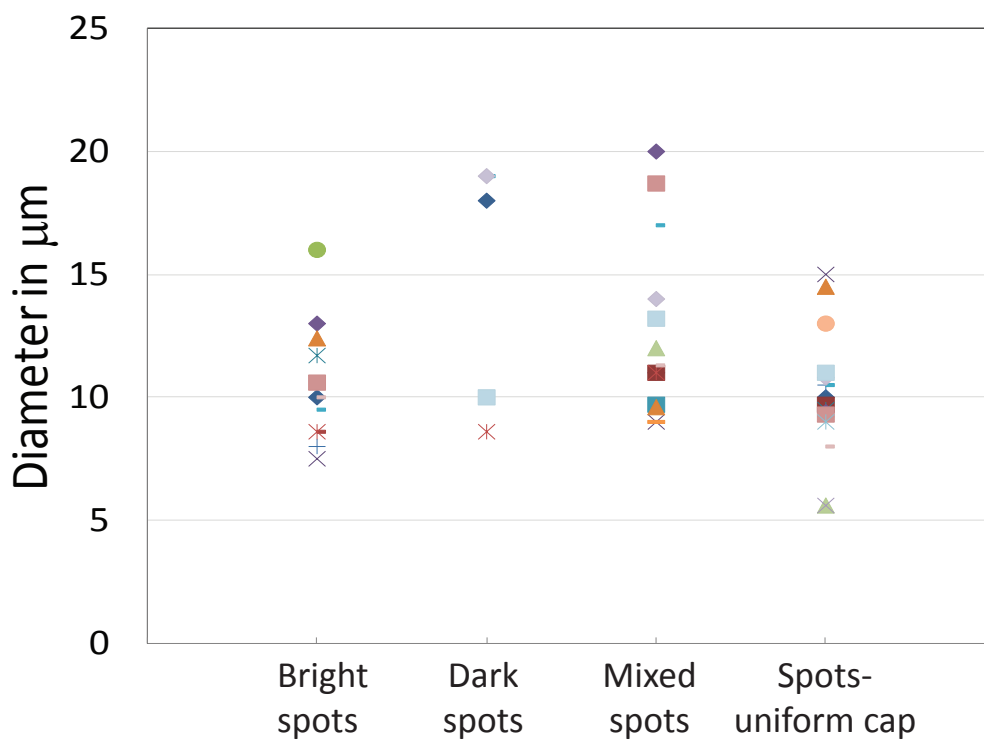

Figure 1: **Domain morphologies are independent of droplet sizes in polydisperse emulsions obtained from coarse emulsification.** A polydisperse emulsion was prepared with the lipid composition DOPC:Cholesterol 70:30. A 3D transparent packing of such droplets was analyzed by measuring the size and reporting the corresponding domain morphology for each droplet in the sample. No obvious correlation between the size of the droplet and its topology can be identified from this analysis.
